# Supplementary material
Source: Springer Nature journal article supplement (https://www.springermedizin.de/resource/supplementary/12885_2007_884_MOESM2_ESM.pdf/9470588)

**p=0.0393**

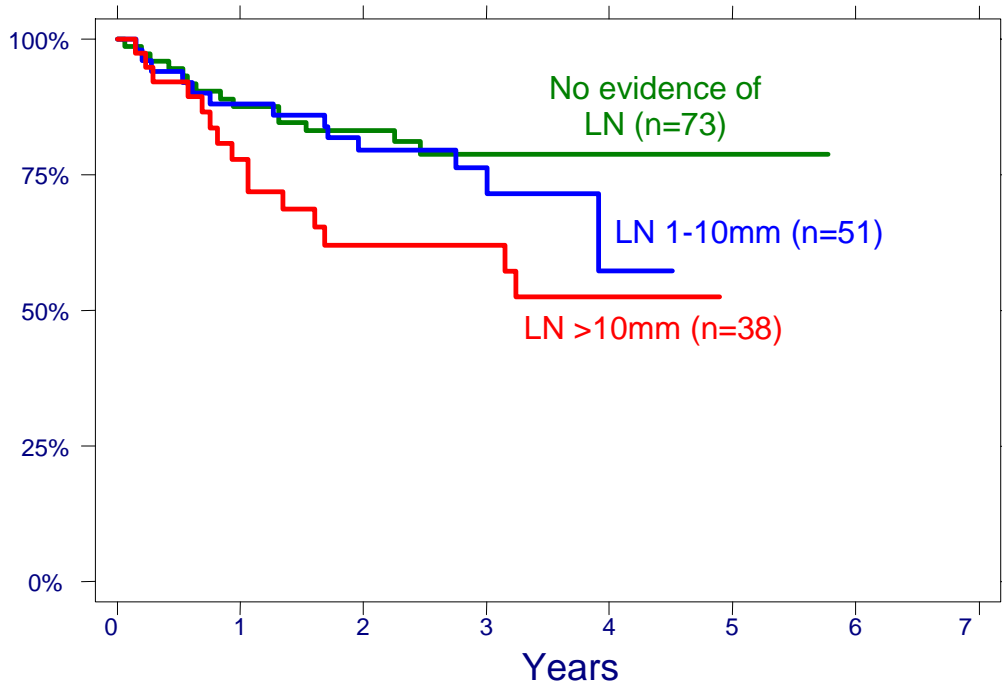

Supplement: MOESM2 [file 9470588]
